# Supplementary material for: Temporal Regularity of the Environment Drives Time Perception
Source: PubMed Central journal article supplement (PMC4956244; doi:10.1371/journal.pone.0159842), 2016-07-21
Supplement: pone.0159842.s001.pdf [file pone.0159842.s001.pdf]

## Supporting Information S1

**S1 Table. Analysis of the ‘regular’ responses as a function of jitter separately for each anisochrony and group of Experiment 1.**  $F$  values and Bonferroni-corrected  $p$  values ( $p$  values are multiplied by 15) for one-way r.m. ANOVA on the proportion of responses in the four conditions at each level of anisochrony. Asterisks denote significant  $p$  values at 5% alpha level.

| Anisochrony<br>[ms] | Regular group |        |              | Irregular group |        |              |
|---------------------|---------------|--------|--------------|-----------------|--------|--------------|
|                     | $F_{3,27} =$  | $p =$  | $\eta_p^2 =$ | $F_{3,27} =$    | $p =$  | $\eta_p^2 =$ |
| -200                | 0.7           | >0.99  | 0.07         | 4.2             | 0.228  | 0.32         |
| -150                | 0.3           | >0.99  | 0.04         | 0.7             | >0.99  | 0.07         |
| -100                | 0.1           | >0.99  | 0.02         | 7.1             | *0.017 | 0.44         |
| -80                 | 1.2           | >0.99  | 0.12         | 11.9            | *0.001 | 0.57         |
| -60                 | 12.3          | *0.001 | 0.58         | 25.5            | *0.001 | 0.74         |
| -40                 | 4.3           | 0.198  | 0.32         | 37.0            | *0.001 | 0.80         |
| -20                 | 14.0          | *0.001 | 0.61         | 25.2            | *0.001 | 0.74         |
| 0                   | 7.1           | *0.017 | 0.44         | 24.4            | *0.001 | 0.73         |
| 20                  | 6.1           | *0.039 | 0.40         | 32.7            | *0.001 | 0.78         |
| 40                  | 12.1          | *0.001 | 0.57         | 26.0            | *0.001 | 0.74         |
| 60                  | 6.7           | *0.023 | 0.43         | 38.8            | *0.001 | 0.81         |
| 80                  | 0.1           | >0.99  | 0.01         | 12.8            | *0.001 | 0.59         |
| 100                 | 1.4           | >0.99  | 0.14         | 9.4             | *0.003 | 0.51         |
| 150                 | 0.2           | >0.99  | 0.02         | 4.3             | 0.208  | 0.32         |
| 200                 | 3.4           | 0.473  | 0.28         | 0.2             | >.99   | 0.02         |
