# Supplementary material for: Temporal Regularity of the Environment Drives Time Perception
Source: PubMed Central journal article supplement (PMC4956244; doi:10.1371/journal.pone.0159842), 2016-07-21
Supplement: pone.0159842.s002.pdf [file pone.0159842.s002.pdf]

## Supporting Information S2

**S2 Table. Analysis of the “regular” responses in the 0ms jitter at each anisochrony comparing the regular and irregular groups of Experiment 1.** *T* values and Bonferroni-corrected *p* values (values are multiplied by 15) for independent-sample t-tests on the proportion of responses between the two groups at each level of anisochrony. Asterisks denote significant *p* values at 5% alpha level.

| Anisochrony<br>[ms] | 0ms jitter – Difference between groups |            |
|---------------------|----------------------------------------|------------|
|                     | <i>T</i> <sub>18</sub> =               | <i>p</i> = |
| -200                | -0.6                                   | 0.556      |
| -150                | -0.1                                   | 0.237      |
| -100                | -0.3                                   | 0.760      |
| -80                 | -0.3                                   | 0.778      |
| -60                 | -0.4                                   | 0.671      |
| -40                 | -2.6                                   | *0.019     |
| -20                 | -3.9                                   | *0.001     |
| 0                   | -2.1                                   | *0.047     |
| 20                  | -2.5                                   | *0.021     |
| 40                  | -1.2                                   | 0.242      |
| 60                  | -0.6                                   | 0.546      |
| 80                  | -0.1                                   | 0.922      |
| 100                 | -1.0                                   | 0.336      |
| 150                 | -0.4                                   | 0.680      |
| 200                 | 0.5                                    | 0.567      |
