# Supplementary material for: Temporal Regularity of the Environment Drives Time Perception
Source: PubMed Central journal article supplement (PMC4956244; doi:10.1371/journal.pone.0159842), 2016-07-21
Supplement: pone.0159842.s003.pdf [file pone.0159842.s003.pdf]

## Supporting Information S3

**S3 Table. Descriptive statistics for the parameters obtained by fitting Yarrow et al.'s (2011) 'two noisy criteria simultaneity model' to the data of Experiment 1.**

| Parameter       | Mean           |                  | Standard Error of the Mean |                  |
|-----------------|----------------|------------------|----------------------------|------------------|
|                 | <i>Regular</i> | <i>Irregular</i> | <i>Regular</i>             | <i>Irregular</i> |
| Threshold Early | -80.1          | -83.8            | 14.2                       | 8.9              |
| Threshold Late  | 83.1           | 95.2             | 12.9                       | 12.5             |
| Slope Early     | 58.9           | 38.2             | 10.8                       | 5.1              |
| Slope Late      | 74.5           | 43.7             | 12.4                       | 4.4              |
